# Supplementary material for: Cancer Progression Gene Expression Profiling Identifies the Urokinase Plasminogen Activator Receptor as a Biomarker of Metastasis in Cutaneous Squamous Cell Carcinoma
Source: PubMed Central journal article supplement (PMC9035872; doi:10.3389/fonc.2022.835929), 2022-04-11
Supplement: Image_1.pdf [file Image_1.pdf]

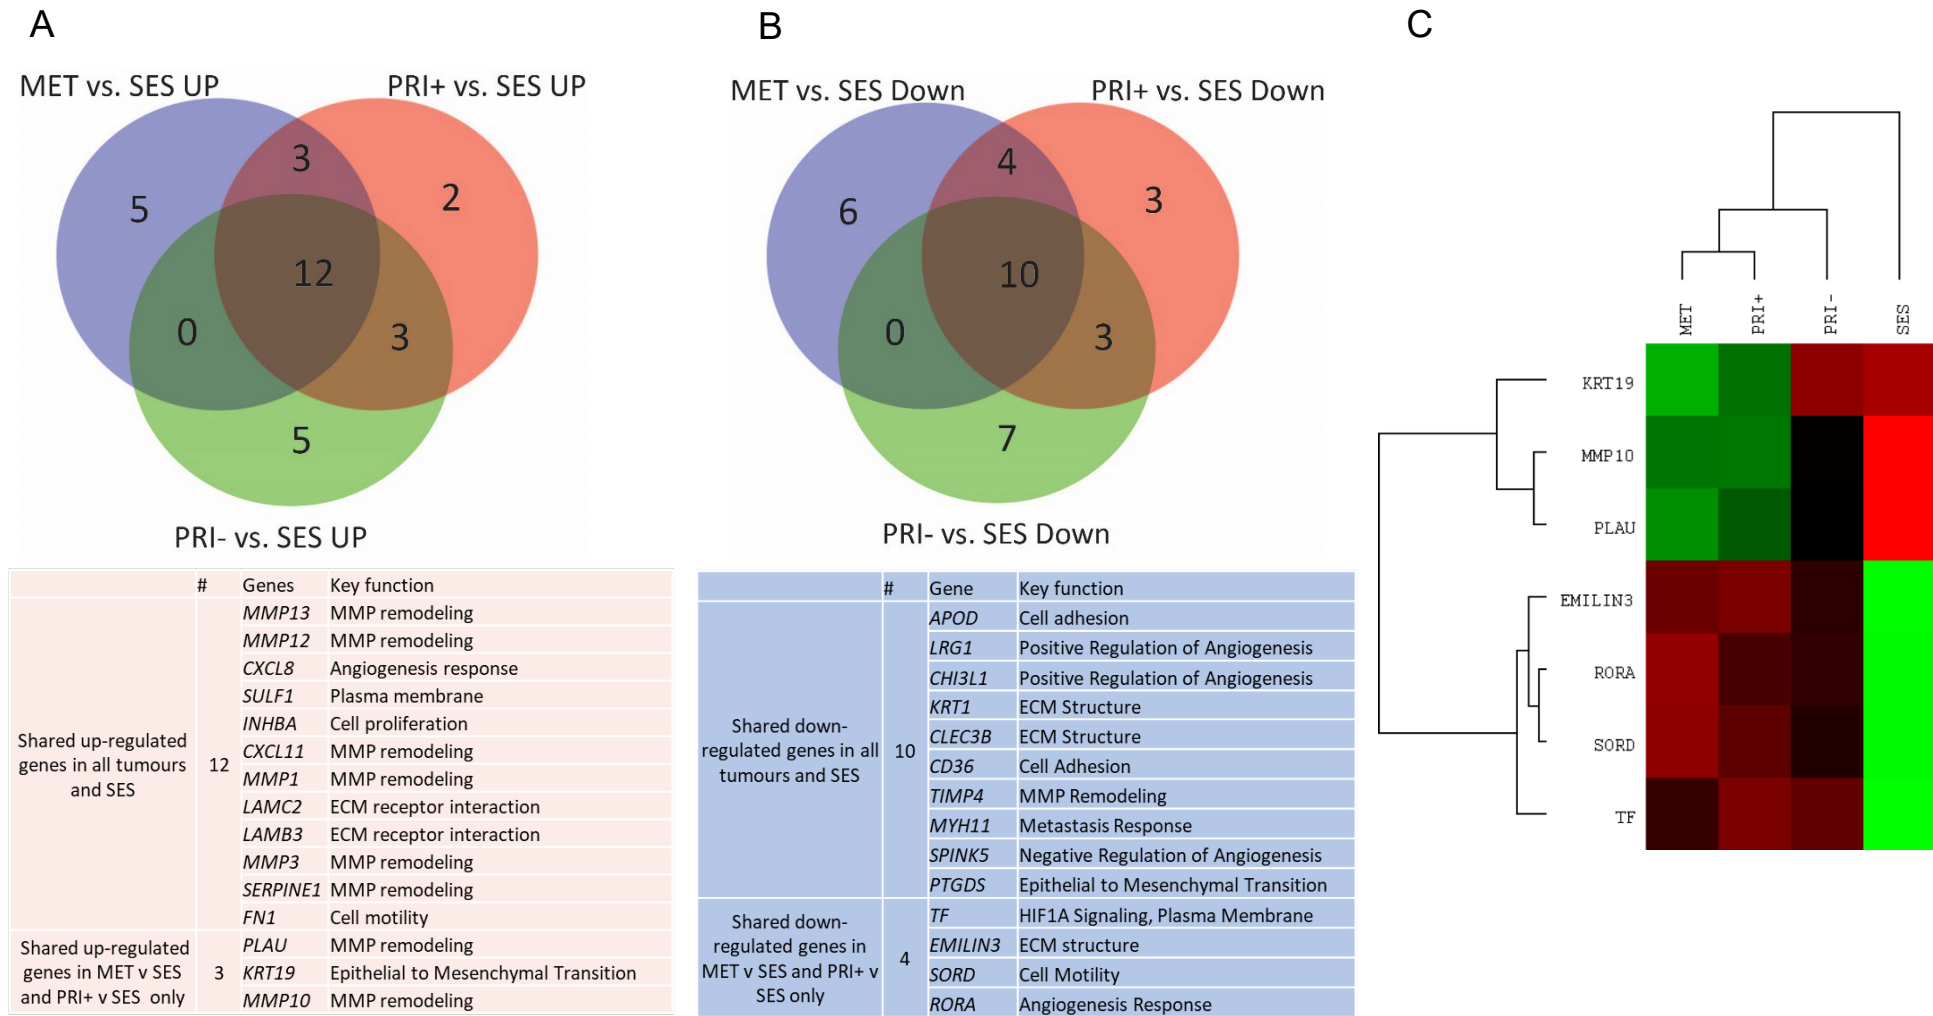

**Supplementary Image 1.** Venn diagram of a) top 20 up-regulated genes and b) top 20 down-regulated genes between MET vs. SES, PRI+ vs. SES, and PRI- vs. SES (adjP-value  $\leq 0.05$ , Log2 fold change  $\geq 1$ ). The number of DEG for each pairwise comparison is indicated in the circles of the Venn diagram. The overlap between the circles shows DEGs that occur in more than one comparison (i.e. are shared). Panels below list the up and down-regulated shared genes between all cohort or MET/PRI+ vs. SES comparisons and their key functions (as annotated by nCounter PanCancer Progression Panel). c) Agglomerative Cluster - Heat Map (using Euclidean distance metric) of selected gene expression of grouped cohort data. Count data has undergone z-score transformation to give equal mean and variance across the samples. Red indicates a higher score, green indicates a lower score.
