# Supplementary material for: Cancer Progression Gene Expression Profiling Identifies the Urokinase Plasminogen Activator Receptor as a Biomarker of Metastasis in Cutaneous Squamous Cell Carcinoma
Source: PubMed Central journal article supplement (PMC9035872; doi:10.3389/fonc.2022.835929), 2022-04-11
Supplement: Image_4.pdf [file Image_4.pdf]

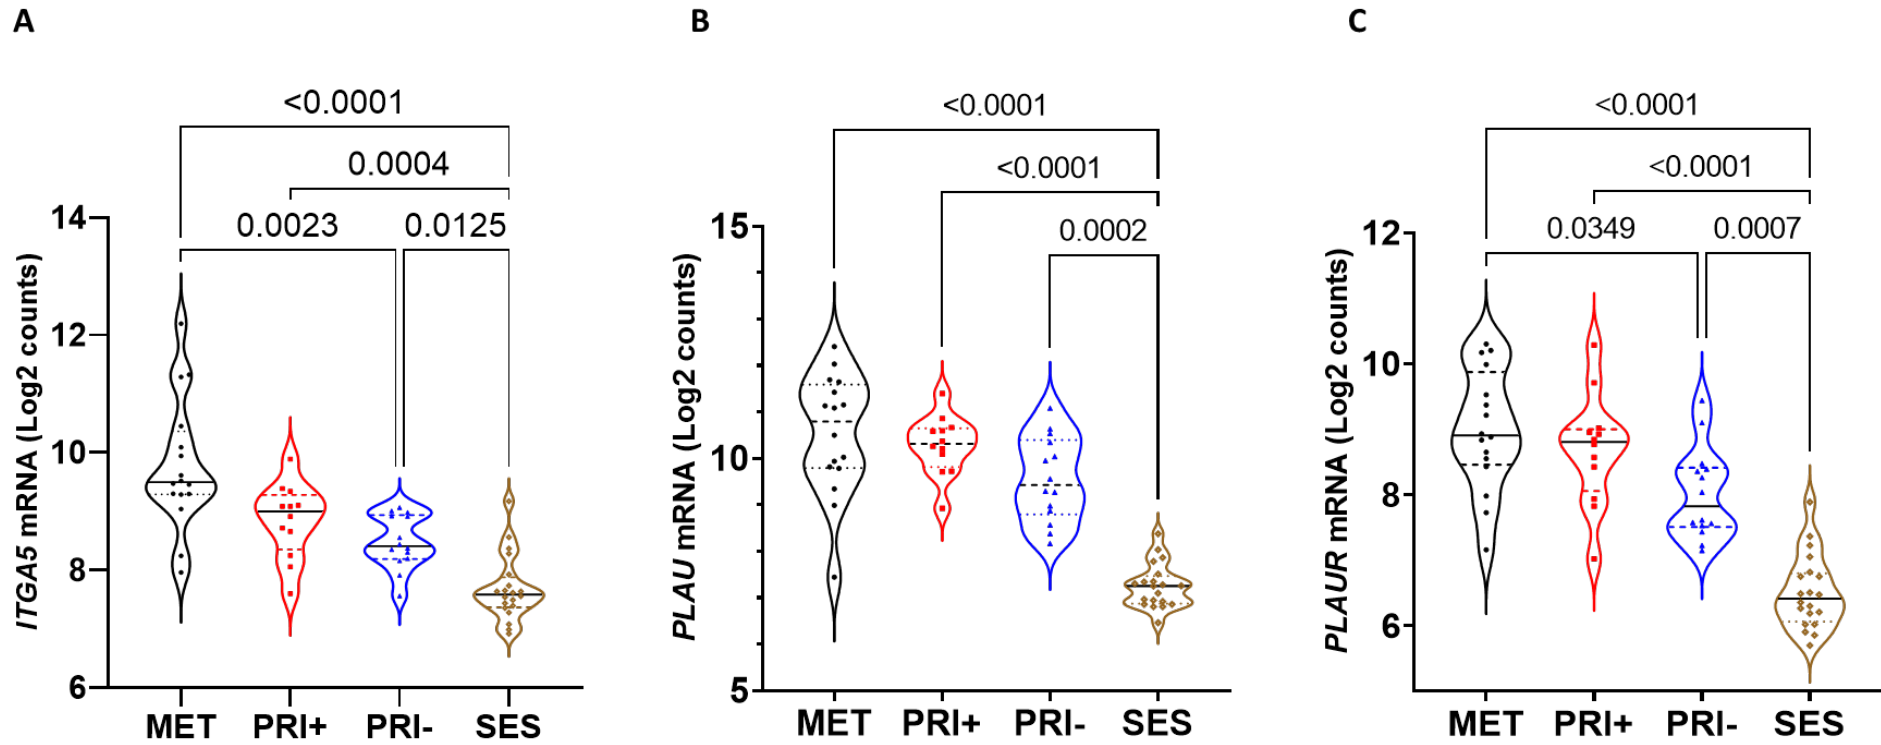

**Supplementary Image 4.** Violin plots showing a) *ITGA5*, b) *PLAU*, and c) *PLAUR* expression across cohorts. The median value is represented by a horizontal solid line and the quartiles by the dotted lines. The data was analyzed by One-way non-parametric ANOVA (Kruskal-Wallis test) with Dunnet's post hoc test. Significant *P*-values shown above.
