# Supplementary material for: Cancer Progression Gene Expression Profiling Identifies the Urokinase Plasminogen Activator Receptor as a Biomarker of Metastasis in Cutaneous Squamous Cell Carcinoma
Source: PubMed Central journal article supplement (PMC9035872; doi:10.3389/fonc.2022.835929), 2022-04-11
Supplement: Image_5.pdf [file Image_5.pdf]

**A**

MET v PRI+ - 2021-09-16 09:51 AM - Diseases &amp; Functions

Sorted by: z-score Colored by: z-score -2.682 2.426

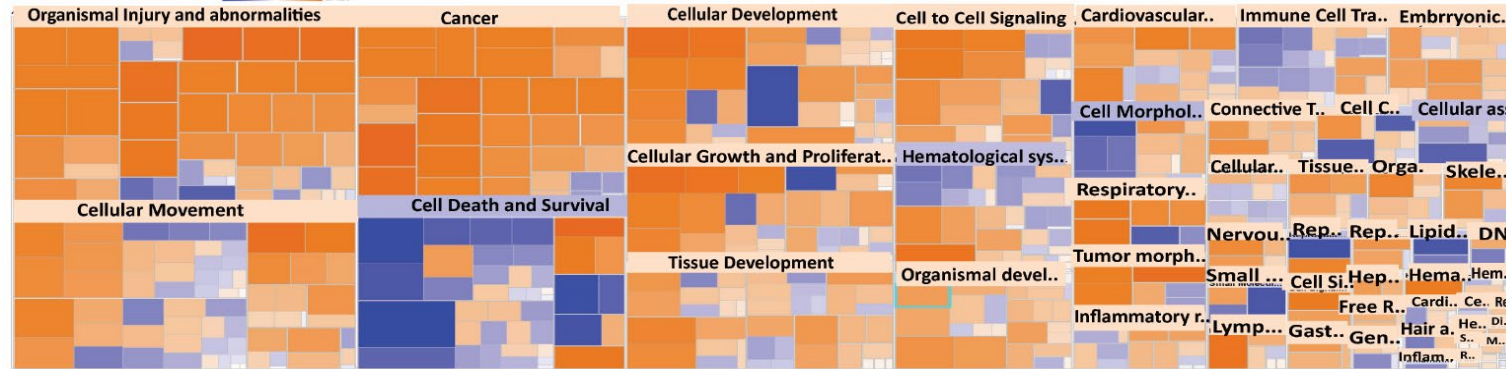

© 2000-2021 QIAGEN. All rights reserved.

**B**

MET v PRI- - 2021-09-16 09:49 AM - Diseases &amp; Functions

Sorted by: z-score Colored by: z-score -2.433 2.248

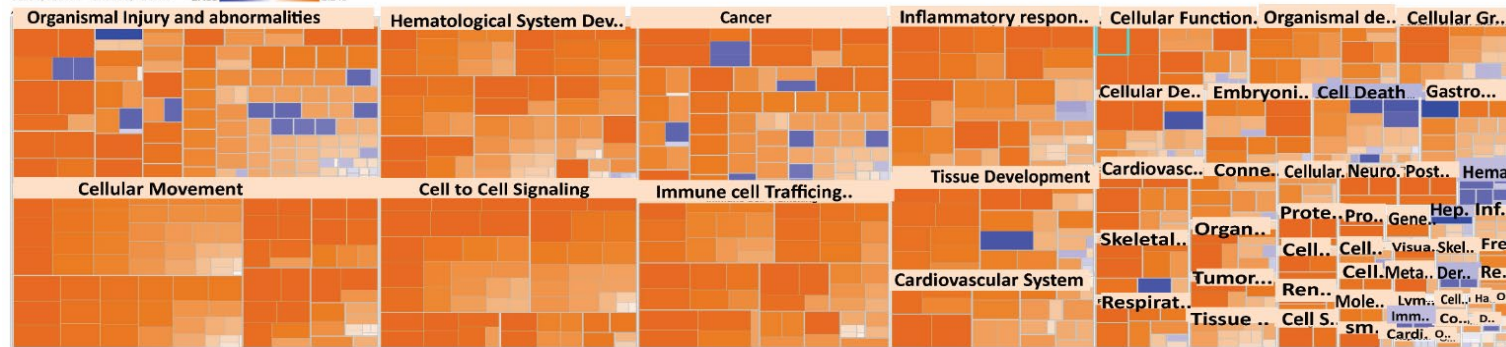

© 2000-2021 QIAGEN. All rights reserved.

**C**

PRI+ v PRI- - 2021-09-16 09:47 AM - Diseases &amp; Functions

Sorted by: z-score Colored by: z-score -1.975 2.078

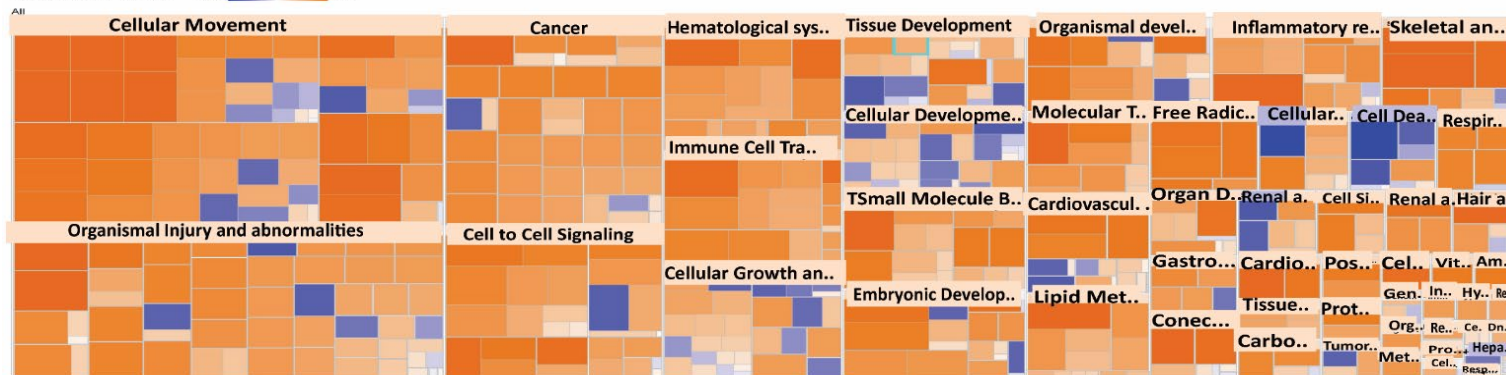

© 2000-2021 QIAGEN. All rights reserved.

**Supplementary Image 5.** Top scoring IPA Diseases and Function analysis heatmaps of a) MET vs. PRI+, b) MET vs. PRI-, and c) PRI+ vs. PRI-. The box plots are provided by IPA; each of the many internal boxes represents one annotation, with the box size and the color indicating the z-score. The bar size on top of each heatmap indicates the z-score. Blue indicates inhibition, orange indicates activation.
