# Supplementary material for: Cancer Progression Gene Expression Profiling Identifies the Urokinase Plasminogen Activator Receptor as a Biomarker of Metastasis in Cutaneous Squamous Cell Carcinoma
Source: PubMed Central journal article supplement (PMC9035872; doi:10.3389/fonc.2022.835929), 2022-04-11
Supplement: Image_6.pdf [file Image_6.pdf]

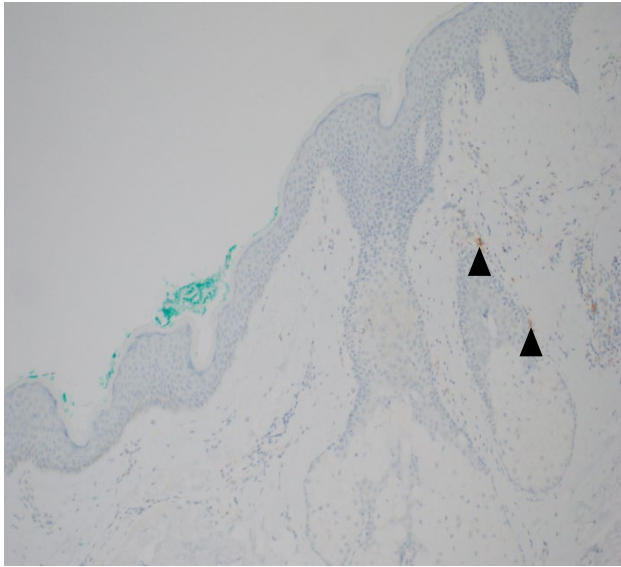

**Supplementary Image 6.** SES sectioned distantly from any tumors showing lack of uPAR staining in epidermis. Evidence of positive histocytes in dermis (arrowheads). 20x magnification.
